# Supplementary material
Source: Royal Society of Chemistry journal article supplement (doi:10.1039/d6tc00675b)
Supplement: d6tc00675b1.pdf [file d6tc00675b1.pdf]

**Fabrication of three-dimensional flower-ball heterostructures  
MoS<sub>2</sub>/LDHs based on interface coupling strategy and their  
application in high-performance NO<sub>x</sub> gas sensing**

Chong Lin, Hongyi Wu, Zhou Zhou, Guanyi Wang, Meng Bao, Fan Zhu, Shiqiao  
Zhao, Li Li\*, Keying Shi\*

Key Laboratory of Functional Inorganic Material Chemistry, Ministry of Education.  
School of Chemistry and Material Science, Heilongjiang University, Harbin, 150080,  
P. R. China.

\* Corresponding authors

E-mail: [lili1993036@hlju.edu.cn](mailto:lili1993036@hlju.edu.cn); [shikeying2008@163.com](mailto:shikeying2008@163.com)

|                                                                                                                                                      |    |
|------------------------------------------------------------------------------------------------------------------------------------------------------|----|
| Fig. S1 XRD spectra and FT-IR spectrum of CoAl-LDHs for (a,c) different temperatures and (b,d) different times.[1,2].....                            | 1  |
| Fig. S2 XRD spectra for (a) MC-1, MC-3 and (b) MoS <sub>2</sub> . [3] .....                                                                          | 1  |
| Fig. S3 (a, b) N <sub>2</sub> adsorption-desorption curves and pore size distributions for MC-1 and MC-3; (c) EPR spectrum for CM-2.....             | 2  |
| Fig. S4 SEM images of MoS <sub>2</sub> . .....                                                                                                       | 2  |
| Fig. S5 XPS analysis of MC-1, MC-2, MC-3 (a) full spectrum analysis; (b) C 1s analysis; (c) Al 2p analysis; (d, e, f) O 1s analysis.[4].....         | 3  |
| Fig. S6 Dynamic response-recovery time curves for (a) MC-1, (b) MC-3, (c) LDHs, and (d) MoS <sub>2</sub> . .....                                     | 3  |
| Fig. S7 MC-2 of (a) Gas sensing test at room temperature for 100 ppm NO <sub>2</sub> at different humidity conditions; (b) Contact angle images..... | 4  |
| Fig. S8 (a, b) UV-Vis diffuse reflectance spectra of MoS <sub>2</sub> and LDHs; (c, d) Kelvin probe test results for MoS <sub>2</sub> and LDHs. .... | 4  |
| Fig. S9 XPS analysis of valence band (a) MoS <sub>2</sub> ; (b) LDHs.....                                                                            | 5  |
| Fig. S10 Band gap diagram of (a) MC-1 , (b) MC-2 and (c) MC-3.....                                                                                   | 5  |
| Fig. S11 MC-2 exposed to NO <sub>2</sub> (a) FT-IR spectra; (b) TPD; (c) XPS analysis of O 1s; (d) XPS analysis of N 1s.[5].....                     | 6  |
| Table S1 Comparison of gas sensing properties reported in previous literatures. ....                                                                 | 7  |
| Table S2 Sample specific surface area and pore size.....                                                                                             | 8  |
| Table S3 Percentage of atomic mass of MC-2. ....                                                                                                     | 8  |
| Table S4 XPS analysis of the percentage content of O <sub>a</sub> , O <sub>b</sub> and O <sub>c</sub> .....                                          | 8  |
| Table S5 Response, response time and recovery time of MC-2 and its comparative sensors at room temperature (RT = 25 °C, RH 25%).....                 | 9  |
| Table S6 Parameters obtained by fitting the experimental curve to the equivalent circuit.....                                                        | 10 |
| Scheme S1 Gas sensing device diagram. ....                                                                                                           | 10 |
| References .....                                                                                                                                     | 10 |

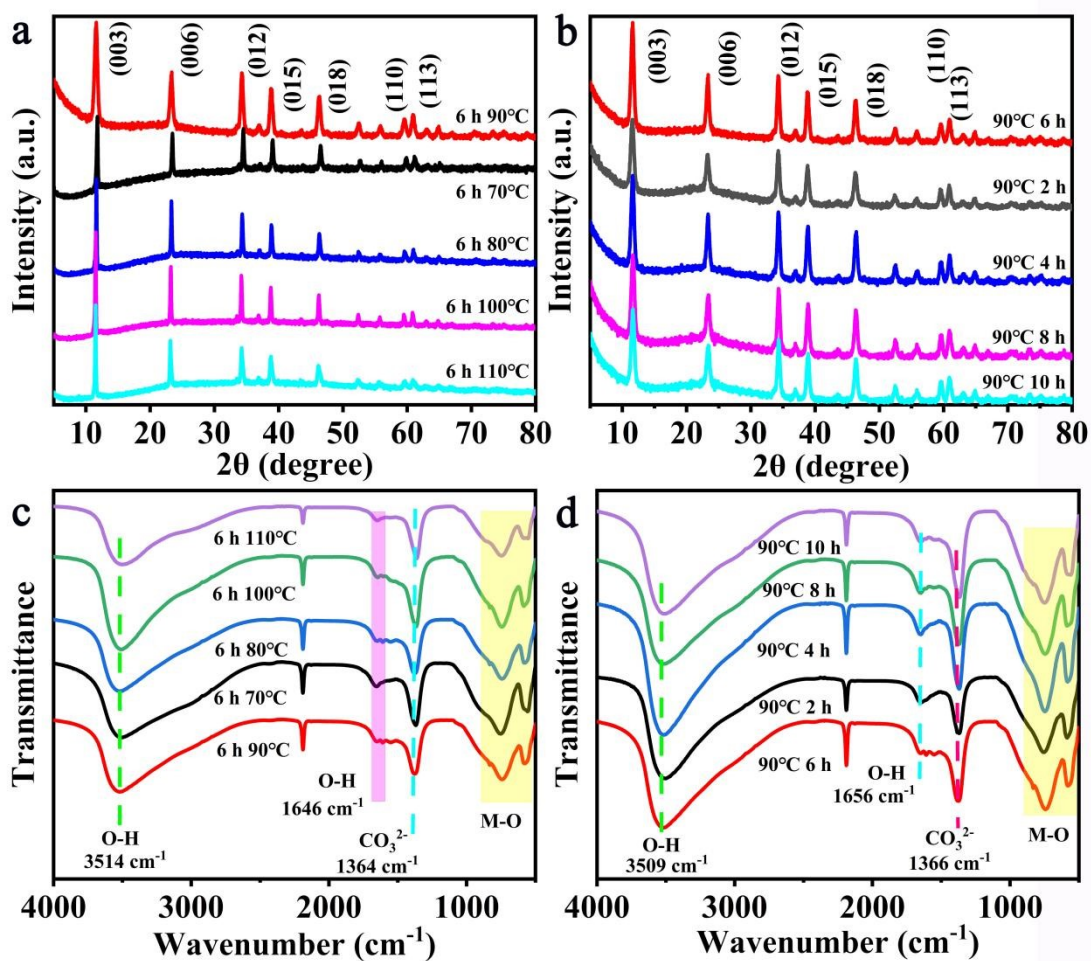

Fig. S1 XRD spectra and FT-IR spectrum of CoAl-LDHs for (a,c) different temperatures and (b,d) different times.[1,2]

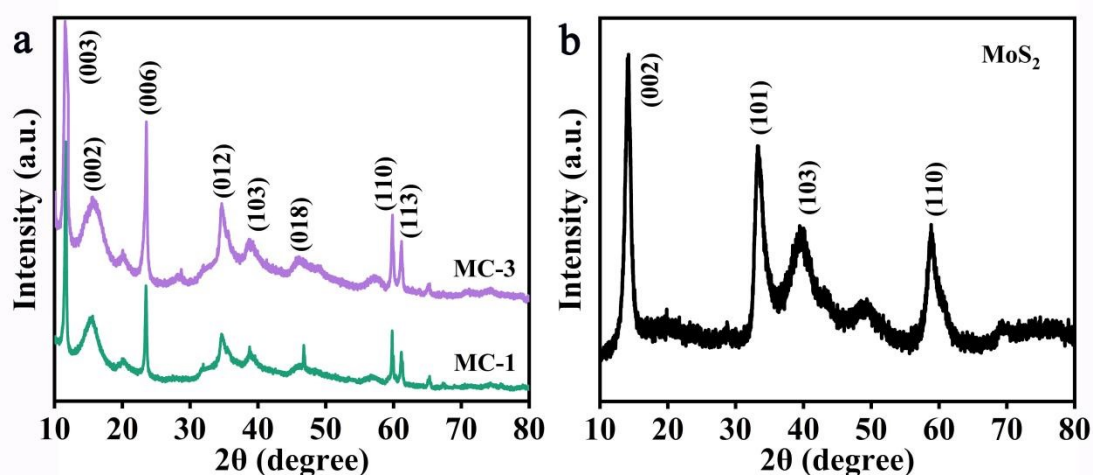

Fig. S2 XRD spectra for (a) MC-1, MC-3 and (b) MoS<sub>2</sub>. [3]

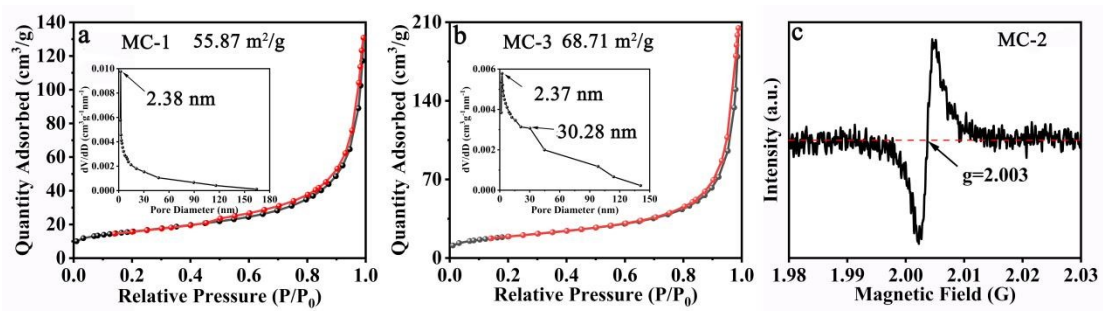

**Fig. S3** (a, b) N<sub>2</sub> adsorption-desorption curves and pore size distributions for MC-1 and MC-3; (c) EPR spectrum for CM-2.

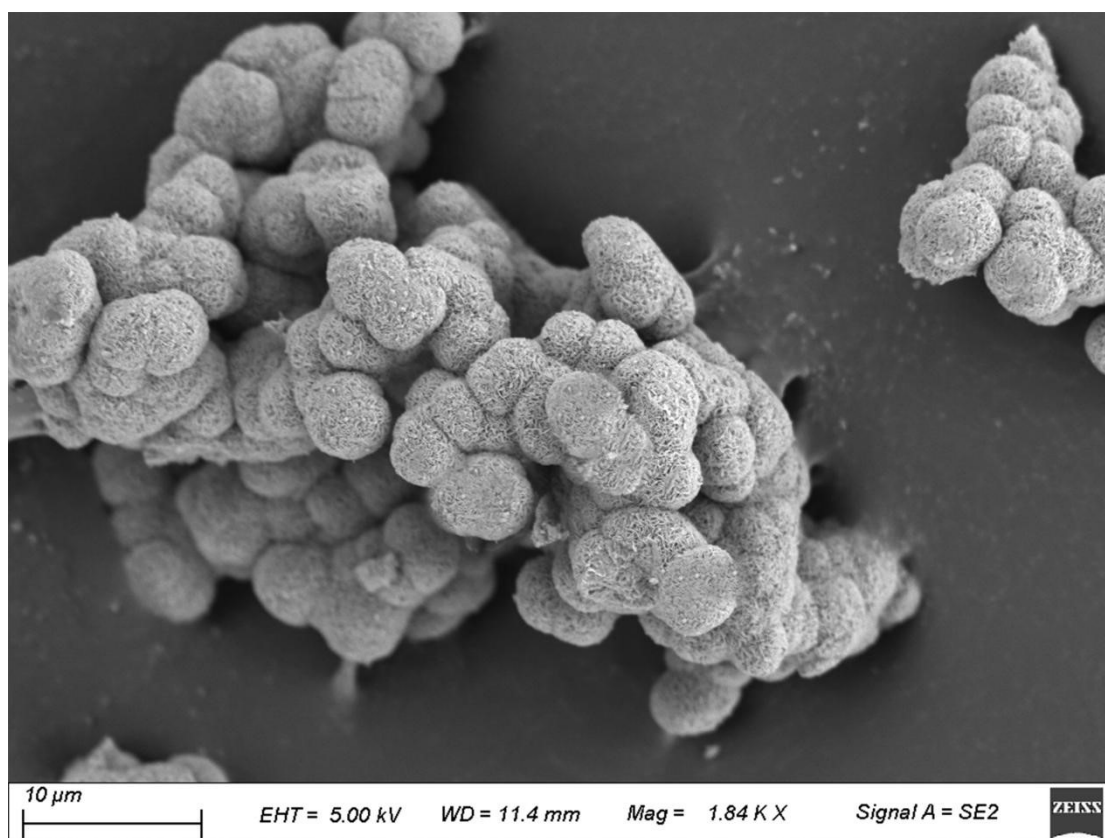

**Fig. S4** SEM images of MoS<sub>2</sub>.

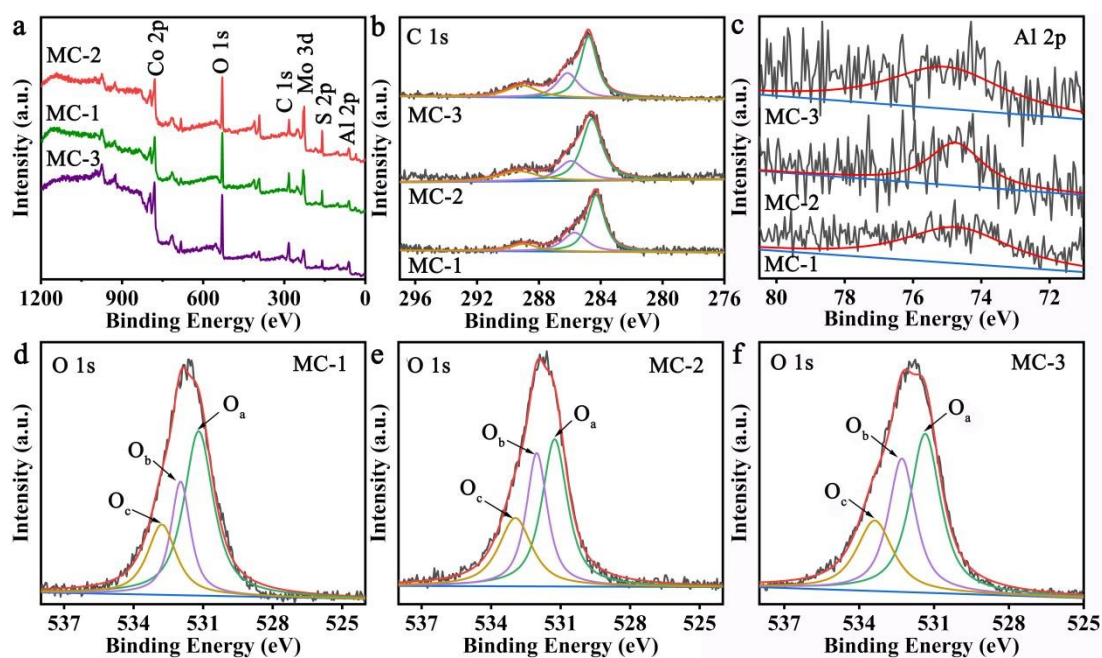

**Fig. S5** XPS analysis of MC-1, MC-2, MC-3 (a) full spectrum analysis; (b) C 1s analysis; (c) Al 2p analysis; (d, e, f) O 1s analysis.[4]

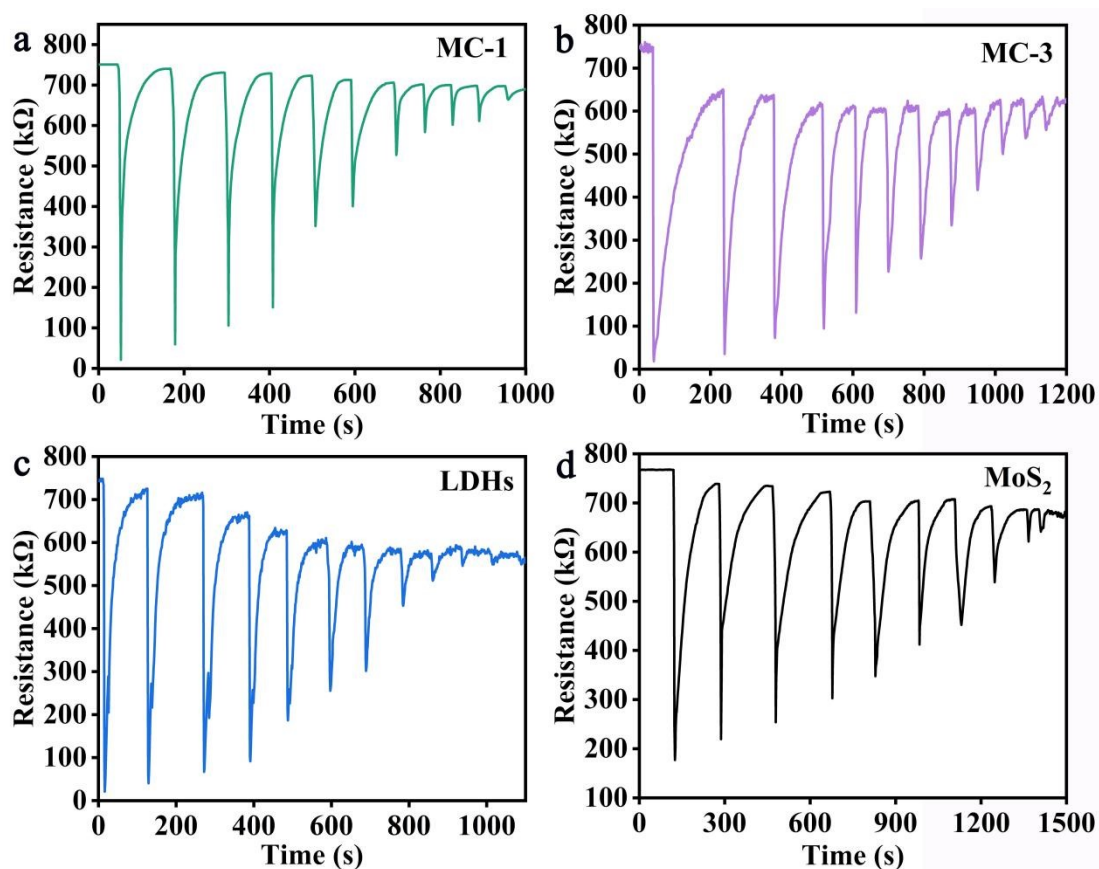

**Fig. S6** Dynamic response-recovery time curves for (a) MC-1, (b) MC-3, (c) LDHs, and (d) MoS<sub>2</sub>.

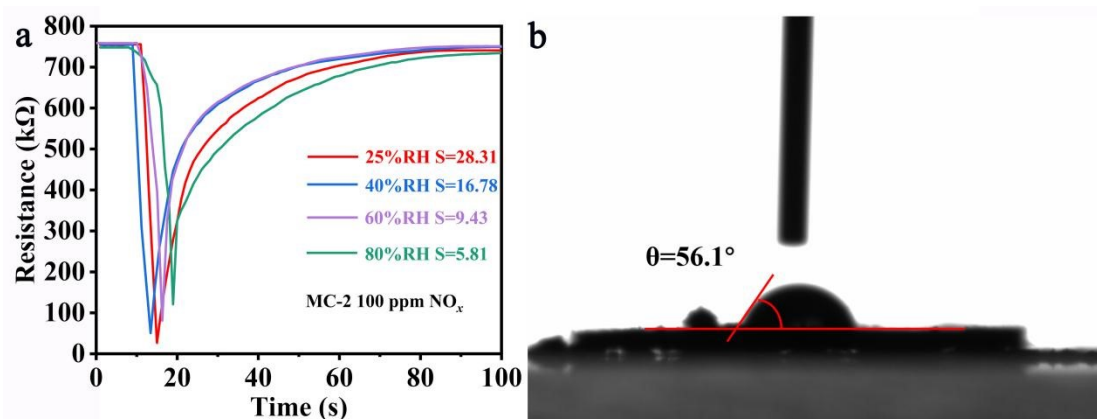

**Fig. S7** MC-2 of (a) Gas sensing test at room temperature for 100 ppm NO<sub>x</sub> at different humidity conditions; (b) Contact angle images.

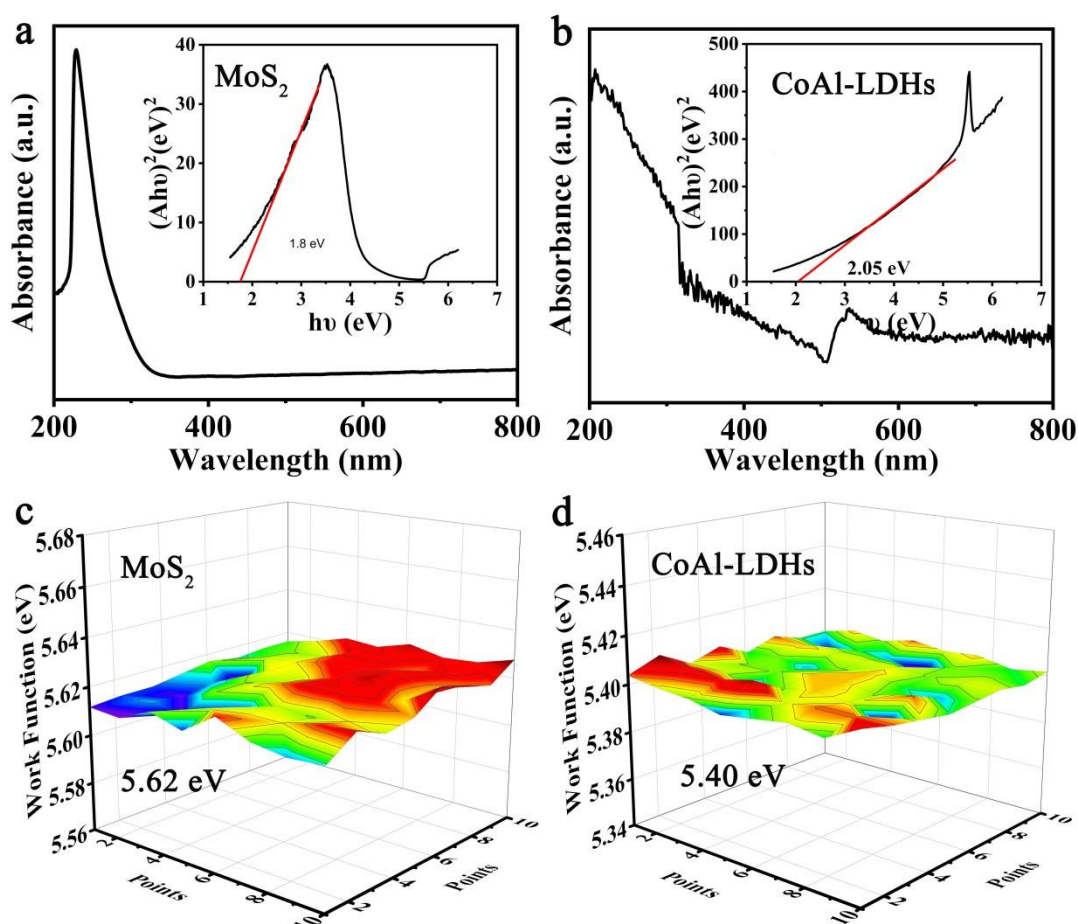

**Fig. S8** (a, b) UV-Vis diffuse reflectance spectra of MoS<sub>2</sub> and LDHs; (c, d) Kelvin probe test results for MoS<sub>2</sub> and LDHs.

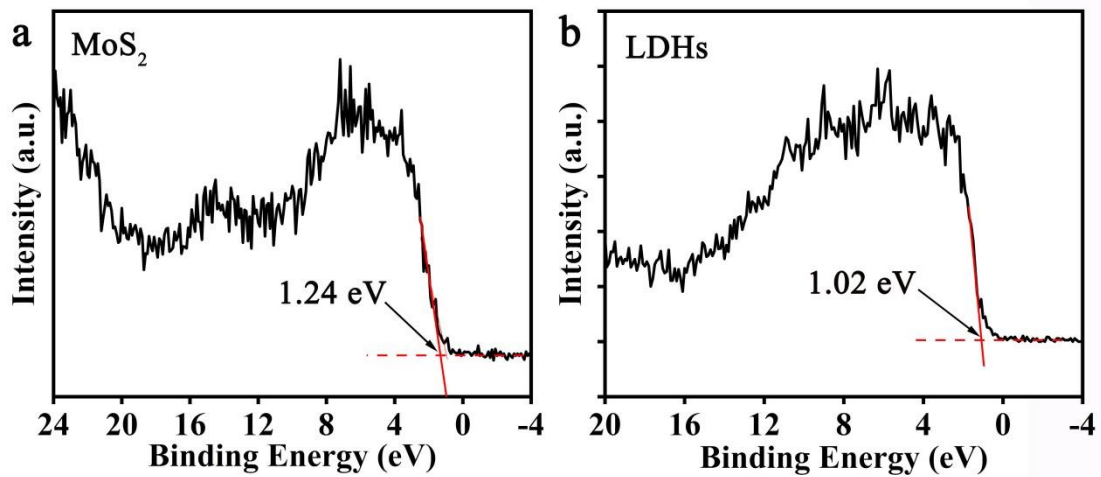

Fig. S9 XPS analysis of valence band (a)MoS<sub>2</sub>; (b) LDHs.

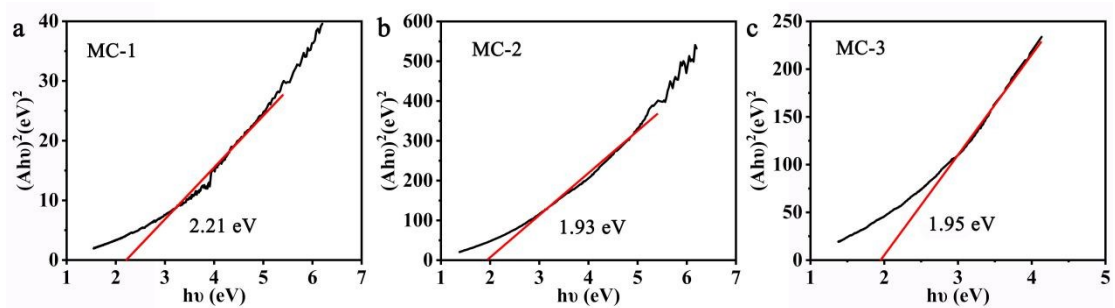

Fig. S10 Band gap diagram of (a) MC-1 , (b) MC-2 and (c) MC-3.

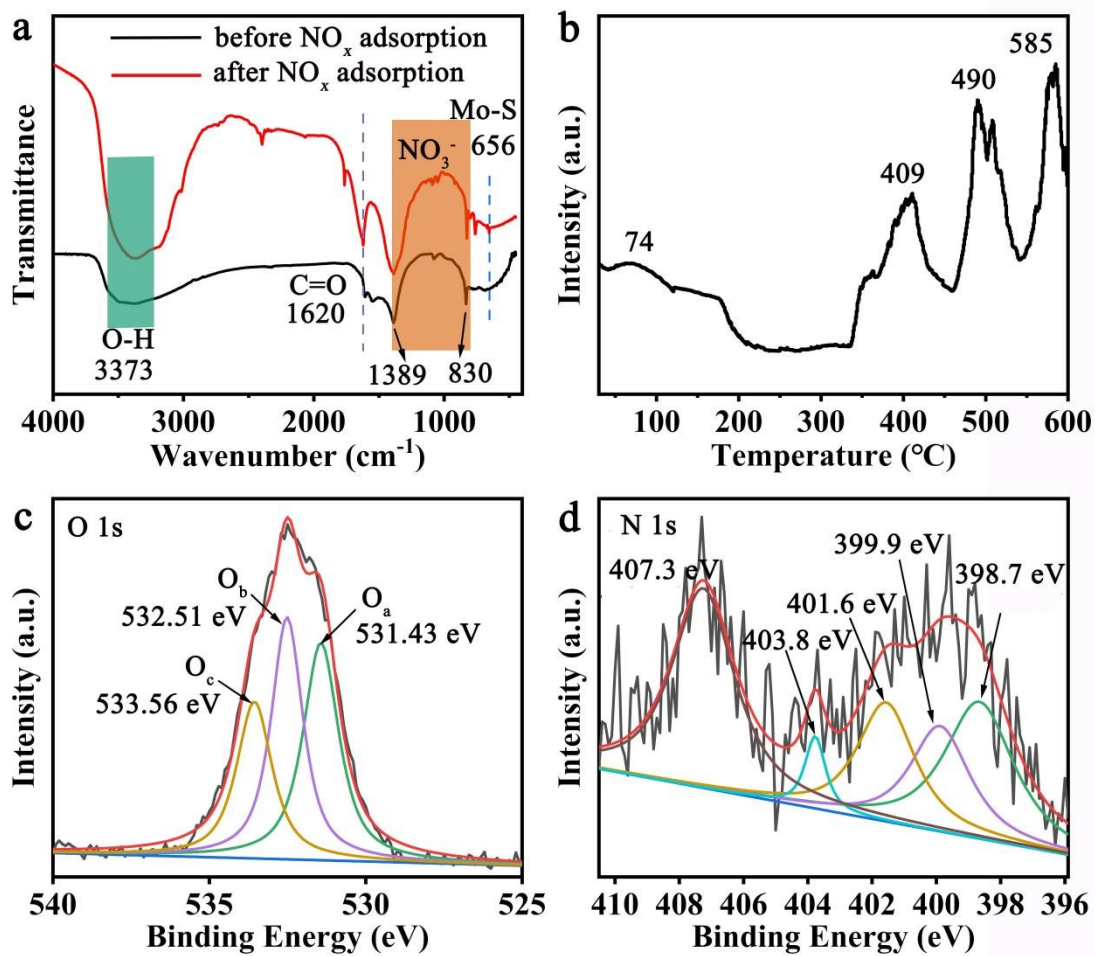

**Fig. S11** MC-2 exposed to  $\text{NO}_x$  (a) FT-IR spectra; (b) TPD; (c) XPS analysis of O 1s; (d) XPS analysis of N 1s.[5]

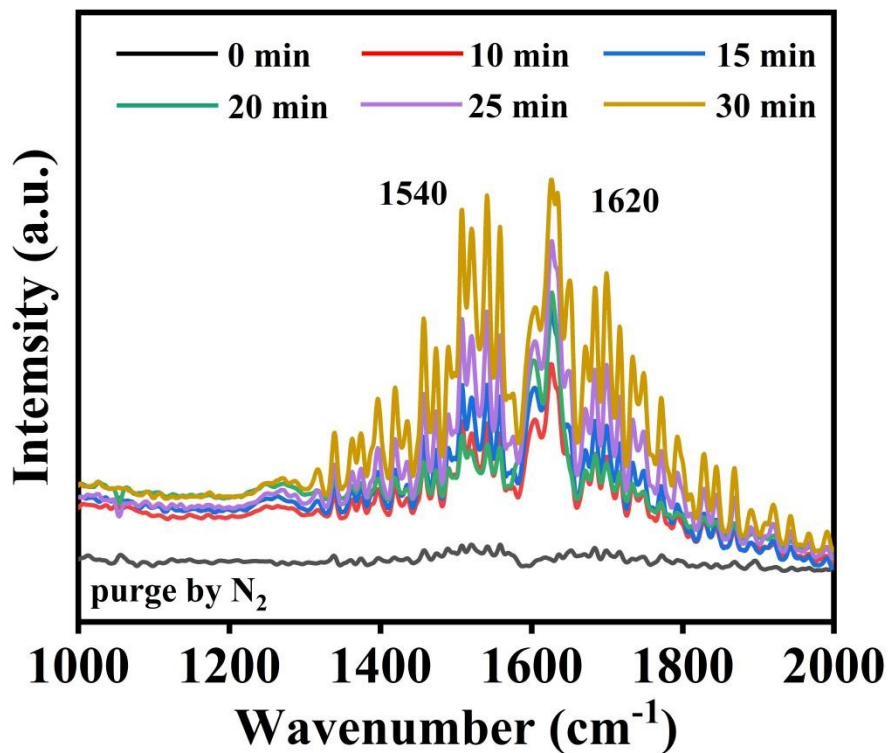

Fig.S12 DRIFT spectra of NO<sub>x</sub> adsorption for the drift spectrum of MC-2.

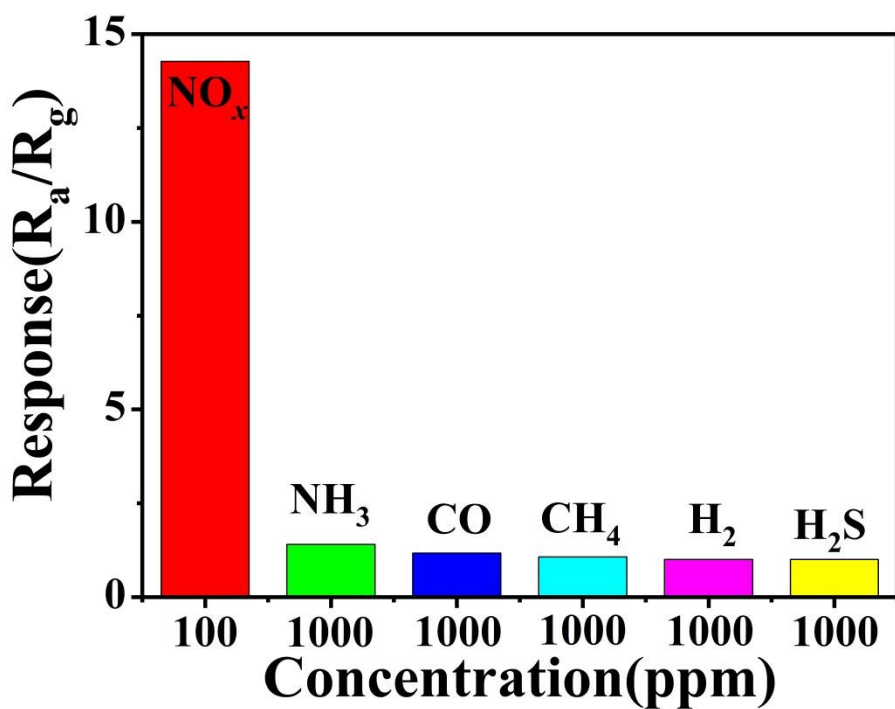

Fig. S13 Selectivity test of LDHs for different gases H<sub>2</sub>, H<sub>2</sub>S, CH<sub>4</sub>, CO, and SO<sub>2</sub> at 1000 ppm, NO<sub>x</sub> at 100 ppm.

**Table S1** Comparison of gas sensing properties reported in previous literatures.

| Sensor material                                      | Gas             | Operating temperature | Gas concentration (ppm) | Response (S)         | Response time (s) | Recovery time (s) | Detection limit (ppm) | Ref.      |
|------------------------------------------------------|-----------------|-----------------------|-------------------------|----------------------|-------------------|-------------------|-----------------------|-----------|
| Mixed MoS <sub>2</sub> flakes                        | NO <sub>2</sub> | RT+UV                 | 10                      | -21.78% <sup>①</sup> | 6.09              | 146.49            | -                     | [6]       |
| MoS <sub>2</sub> /ZnO                                | NO <sub>2</sub> | RT                    | 0.5                     | 20.9% <sup>①</sup>   | -                 | -                 | -                     | [7]       |
| CTAB-MoS <sub>2</sub> /rGO                           | NO <sub>2</sub> | RT                    | 17.5                    | 45.5% <sup>①</sup>   | -                 | -                 | 0.05                  | [8]       |
| MoS <sub>2</sub> /RGO                                | NO <sub>2</sub> | 160 °C                | 3                       | 1.23 <sup>②</sup>    | 8                 | 20                | 0.1                   | [9]       |
| 2D MoS <sub>2</sub>                                  | NO <sub>2</sub> | 100 °C                | 100                     | 21.56% <sup>①</sup>  | 71                | 310               | 5                     | [10]      |
| Thin-layered MoS <sub>2</sub>                        | NO <sub>2</sub> | RT                    | 100                     | 54% <sup>①</sup>     | 180               | 600               | -                     | [11]      |
| MoS <sub>2</sub> /ZnO                                | NO <sub>2</sub> | RT                    | 10                      | 28% <sup>①</sup>     | 408               | 162               | 0.5                   | [12]      |
| MoS <sub>2</sub> hollow sphere                       | NO <sub>2</sub> | 150 °C                | 100                     | 40.3% <sup>①</sup>   | 79                | 225               | 0.5                   | [13]      |
| MoS <sub>2</sub> /Si <sub>3</sub> N <sub>4</sub> /Si | NO <sub>2</sub> | RT                    | 5                       | 59.4% <sup>①</sup>   | 24                | 41                | 1                     | [14]      |
| MoS <sub>2</sub> /LDHs                               | NO <sub>x</sub> | RT                    | 100                     | 25.43 <sup>②</sup>   | 2.13              | 35.53             | 0.03                  | This work |

①:  $S = |R_a - R_g| / R_a \times 100\%$  or  $S = |R_g - R_a| / R_a \times 100\%$

②:  $S = R_a / R_g$

**Table S2** Sample specific surface area and pore size.

| <b>Samples</b>   | <b>BET Surface Area (m<sup>2</sup>·g<sup>-1</sup>)</b> | <b>Pore Diameter (nm)</b> |
|------------------|--------------------------------------------------------|---------------------------|
| MC-1             | 55.87                                                  | 2.38                      |
| MC-2             | 74.11                                                  | 2.35                      |
| MC-3             | 68.71                                                  | 2.37                      |
| LDHs             | 15.63                                                  | 2.35                      |
| MoS <sub>2</sub> | 13.17                                                  | 2.35                      |

**Table S3** Percentage of atomic mass of MC-2.

| <b>Element</b> | <b>Atomic Percents</b> |          |           |           |          |          |
|----------------|------------------------|----------|-----------|-----------|----------|----------|
|                | <b>Mo</b>              | <b>S</b> | <b>Co</b> | <b>Al</b> | <b>C</b> | <b>O</b> |
| Weight (%)     | 3.17                   | 1.66     | 22.27     | 5.33      | 12.39    | 55.18    |
| Atomic (%)     | 0.6                    | 1.07     | 7.35      | 3.84      | 20.06    | 67.08    |

**Table S4** XPS analysis of the percentage content of O<sub>a</sub>, O<sub>b</sub> and O<sub>c</sub>.

| <b>O 1s</b>        | <b>MC-1</b> | <b>MC-2</b> | <b>MC-3</b> | <b>After NO<sub>2</sub> adsorption of MC-2</b> |
|--------------------|-------------|-------------|-------------|------------------------------------------------|
| O <sub>a</sub> (%) | 53.14       | 42.55       | 46.48       | 36.92                                          |
| O <sub>b</sub> (%) | 24.57       | 31.92       | 29.67       | 36.61                                          |
| O <sub>c</sub> (%) | 22.29       | 25.53       | 23.85       | 26.47                                          |

**Table S5** Response, response time and recovery time of MC-2 and its comparative sensors at room temperature (RT = 25 °C, RH 25%)

| Sample                | MC-1  |                   |                   | MC-2  |                   |                   | MC-3  |                   |                   | LDHs  |                   |                   | MoS <sub>2</sub> |                   |                   |  |
|-----------------------|-------|-------------------|-------------------|-------|-------------------|-------------------|-------|-------------------|-------------------|-------|-------------------|-------------------|------------------|-------------------|-------------------|--|
|                       | S     | T <sub>s</sub> /s | T <sub>r</sub> /s | S     | T <sub>s</sub> /s | T <sub>r</sub> /s | S     | T <sub>s</sub> /s | T <sub>r</sub> /s | S     | T <sub>s</sub> /s | T <sub>r</sub> /s | S                | T <sub>s</sub> /s | T <sub>r</sub> /s |  |
| <b>NO<sub>x</sub></b> |       |                   |                   |       |                   |                   |       |                   |                   |       |                   |                   |                  |                   |                   |  |
| <b>(ppm)</b>          |       |                   |                   |       |                   |                   |       |                   |                   |       |                   |                   |                  |                   |                   |  |
| <b>100</b>            | 21.92 | 5.59              | 44.67             | 28.31 | 2.13              | 35.53             | 25.43 | 4.78              | 40.27             | 14.27 | 10.65             | 56.53             | 4.33             | 11.32             | 58.67             |  |
| <b>50</b>             | 15.65 | 7.13              | 40.53             | 21.41 | 2.67              | 33.40             | 19.59 | 6.42              | 38.40             | 8.29  | 13.33             | 50.13             | 3.41             | 14.94             | 53.87             |  |
| <b>30</b>             | 11.91 | 9.20              | 37.87             | 17.47 | 3.74              | 31.73             | 15.83 | 8.39              | 35.73             | 5.47  | 15.47             | 45.73             | 2.89             | 16.51             | 48.53             |  |
| <b>10</b>             | 7.47  | 11.13             | 35.73             | 11.18 | 4.85              | 27.66             | 9.39  | 10.22             | 32.53             | 4.12  | 17.94             | 37.34             | 2.61             | 19.80             | 42.93             |  |
| <b>5</b>              | 5.13  | 13.51             | 32.40             | 7.05  | 5.27              | 23.40             | 6.30  | 12.75             | 30.40             | 2.02  | 21.12             | 35.46             | 1.96             | 22.20             | 38.40             |  |
| <b>3</b>              | 3.47  | 17.20             | 29.33             | 4.70  | 8.53              | 20.80             | 4.11  | 15.06             | 28.80             | 1.73  | 25.23             | 31.45             | 1.71             | 26.55             | 35.20             |  |
| <b>1</b>              | 2.27  | 19.80             | 26.73             | 3.02  | 10.23             | 15.73             | 2.74  | 17.28             | 26.67             | 1.54  | 28.76             | 28.82             | 1.51             | 28.92             | 33.13             |  |
| <b>0.5</b>            | 1.75  | 22.87             | 22.40             | 2.05  | 14.57             | 13.53             | 1.92  | 21.59             | 22.40             | 1.26  | 32.34             | 24.53             | 1.19             | 33.60             | 29.33             |  |
| <b>0.3</b>            | 1.41  | 25.69             | 19.20             | 1.56  | 19.69             | 11.27             | 1.48  | 24.12             | 20.27             | 1.15  | 34.67             | 22.93             | 1.10             | 36.54             | 26.67             |  |
| <b>0.1</b>            | 1.24  | 31.56             | 16.27             | 1.34  | 25.48             | 10.40             | 1.27  | 30.66             | 16.53             | 1.13  | 35.75             | 17.07             | 1.06             | 38.56             | 25.07             |  |
| <b>0.05</b>           | 1.12  | 35.98             | 12.80             | 1.19  | 26.65             | 8.67              | 1.16  | 31.95             | 11.20             | 1.03  | 37.14             | 15.34             |                  |                   |                   |  |
| <b>0.03</b>           | 1.05  | 36.16             | 10.13             | 1.14  | 28.22             | 6.27              | 1.09  | 35.67             | 9.60              |       |                   |                   |                  |                   |                   |  |

\*S: Response T<sub>s</sub>: Response time T<sub>r</sub>: Recovery time

**Table S6** Parameters obtained by fitting the experimental curve to the equivalent circuit.

| Raw materials    | $R1(\Omega)$        | $C1(F)$                 | $R2(\Omega)$        | $C2(F)$                 |
|------------------|---------------------|-------------------------|---------------------|-------------------------|
| MC-1             | $1.663 \times 10^6$ | $5.181 \times 10^{-11}$ | $1.670 \times 10^7$ | $1.383 \times 10^{-11}$ |
| MC-2             | $1.585 \times 10^5$ | $1.316 \times 10^{-11}$ | $4.242 \times 10^6$ | $9.784 \times 10^{-12}$ |
| MC-3             | $2.498 \times 10^5$ | $3.007 \times 10^{-11}$ | $2.198 \times 10^7$ | $2.584 \times 10^{-11}$ |
| LDHs             | $2.333 \times 10^6$ | $6.087 \times 10^{-11}$ | $8.863 \times 10^7$ | $1.192 \times 10^{-11}$ |
| MoS <sub>2</sub> | $3.379 \times 10^6$ | $1.094 \times 10^{-12}$ | $1.056 \times 10^8$ | $1.051 \times 10^{-11}$ |

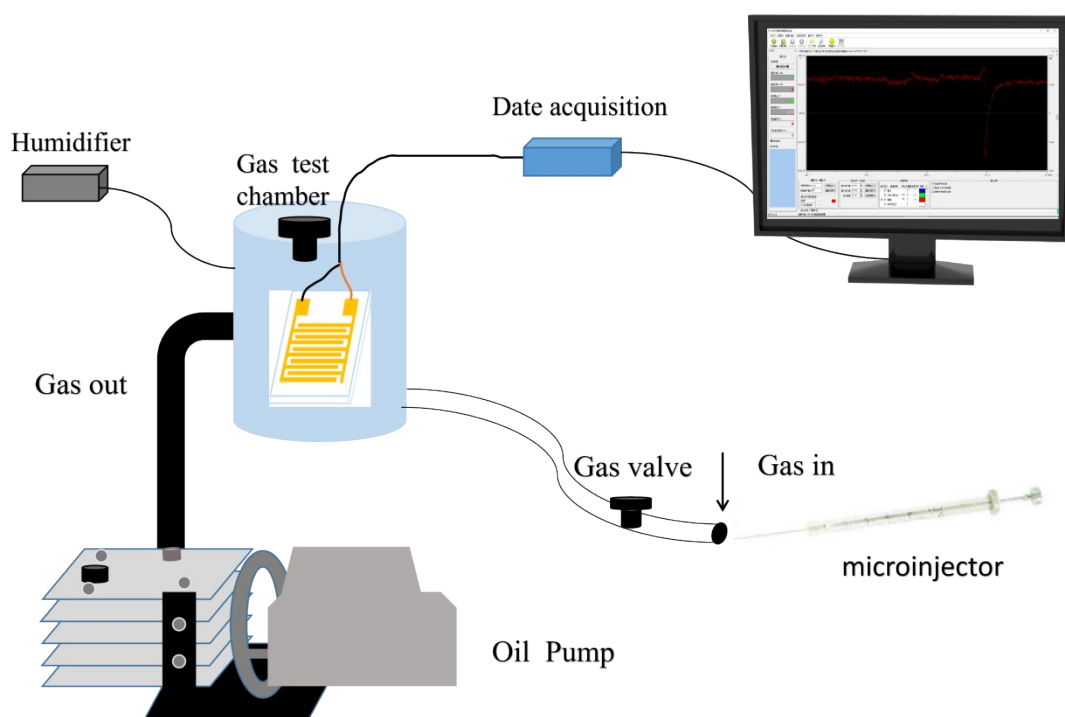

**Scheme S1** Gas sensing device diagram.

## References

- 1 S. X. Zuo, M. Sun, W. F. Gong, T. T. Tang, X. H. Ye, W. J. Liu, N. H. Wong, R. Xu, G. H. Chen, C. Yao, H. G. Gui and X. Z. Li, *Appl. Clay Sci.*, 2024, 262, 107625.
- 2 Y. J. Wang, J. Y. Zhang, S. S. Hou, J. X. Wu, C. Wang, Y. M. Li, G. Y. Jiang and G. Q. Cui, *Petrol. Sci.*, 2022, 19, 3080-3087.
- 3 H. R. Inta, T. Biswas, S. Ghosh, R. Kumar, S. K. Jana and V. Mahalingam,

- Chemnanomat*, 2020, 6, 685-695.
- 4 Y. H. Wei, G. S. Li, J. H. Wang, C. L. Xue, S. F. Fang and L. P. Li, *Chin. J. Struct. Chem.*, 2018, 37, 1093-1101.
  - 5 J. Y. Xie, J. Wang, C. Lin, Z. Zhou, G. Y. Wang, M. Bao, S. S. Cong, R. Zhang, W. X. Lv, Q. J. Pan, L. Li and K. Y. Shi, *Sens. Actuators: B Chem.*, 2025, 443, 138189.
  - 6 A. V. Agrawal, R. Kumar, S. Venkatesan, A. Zakhidov, G. Yang, J. M. Bao, M. Kumar and M. Kumar, *ACS Sens.*, 2018, 3, 998-1004.
  - 7 R. R. Kumar, S. Gupta, A. K. Anbalagan, A. Khan, N. H. Tai, C. H. Lee, and H. N. Lin, *Micromachines*, 2025, 16, 659 (1 of 11).
  - 8 W. B. Li, H. Li, R. Qian, S. J. Zhuo, P. F. Ju and Q. Chen, *Nanomaterials*, 2022, 12, 1300 (1 of 12).
  - 9 Z. Y. Wang, T. Zhang, C. Zhao, T. Y. Han, T. Fei, S. Liu and G. Y. Lu, *Sens. Actuators B: Chem.*, 2018, 260, 508-518.
  - 10 R. Kumar, N. Goel and M. Kumar, *ACS Sens.*, 2017, 2, 1744-1752.
  - 11 D. J. Late, Y. K. Huang, B. Liu, J. Acharya, S. N. Shirodkar, J. J. Luo, A. M. Yan, D. Charles, U. V. Waghmare, V. P. Dravid and C. N. R. Rao, *ACS Nano*, 2013, 7, 4879-4891.
  - 12 S. M. Cui, Z. H. Wen, X. K. Huang, J. B. Chang and J. H. Chen, *Small*, 2015, 11, 2305-2313.
  - 13 Y. X. Li, Z. X. Song, Y. N. Li, S. Chen, S. Li, Y. H. Li, H. R. Wang and Z. K. Wang, *Sens. Actuators B: Chem.*, 2019, 282, 259-267.
  - 14 S. Kumar, A. Sharma, A. K. Sao, J. P. Singh, A. Chowdhuri and M. Tomar, *Chem. Phys. Impact*, 2025, 10, 100847.
  - 15 J. H. Fan, X. P. Wang, C. Lin, S. Q. Zhao, R. Zhang, L. L, Q. J. Pan, X. Bai and K. Y. Shi, *Adv. Funct. Mater.*, 2026, 0: e74638 (1 of 16).
